# Supplementary material
Source: MDPI journal article supplement (https://www.mdpi.com/2076-3417/10/17/5769)

## Supporting Information

### Highly active ruthenium catalyst supported on magnetically separable mesoporous organosilica nanoparticles

**Suheir Omar<sup>1</sup> and Raed Abu-Reziq<sup>2\*</sup>**

<sup>1</sup> Institute of Chemistry, Casali Center of Applied Chemistry, Center for Nanoscience and Nanotechnology, the Hebrew University of Jerusalem 9190401, Israel; suheir.omar@mail.huji.ac.il

<sup>2</sup> Institute of Chemistry, Casali Center of Applied Chemistry, Center for Nanoscience and Nanotechnology, the Hebrew University of Jerusalem 9190401, Israel; Raed.Abu-Reziq@mail.huji.ac.il

\* Correspondence: Raed.Abu-Reziq@mail.huji.ac.il; Tel.: +972-2-6586097

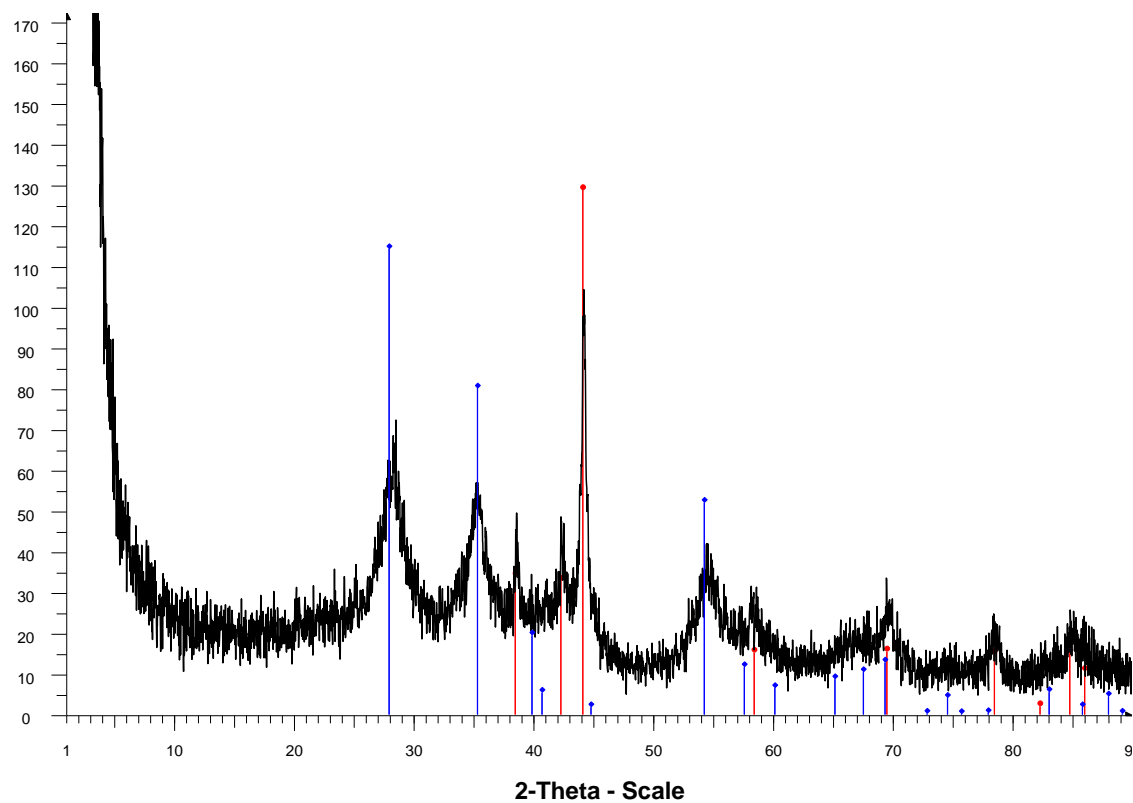

**Figure S1.** XRD pattern of Ru@Ethylene PMO NPs.

GC analysis for the products obtained by hydrogenation of benzene

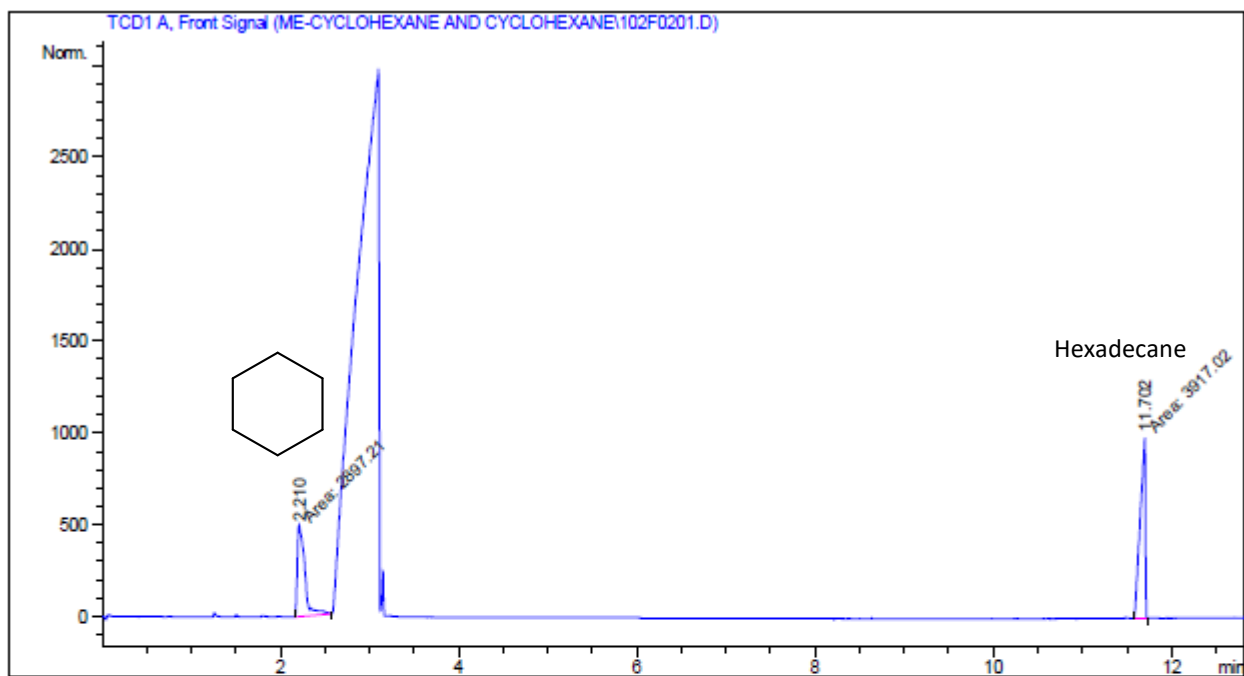

=====  
Area Percent Report  
=====

Sorted By : Signal  
Multiplier: : 1.0000  
Dilution: : 1.0000  
Use Multiplier & Dilution Factor with ISTDs

Signal 1: TCD1 A, Front Signal

| Peak # | RetTime [min] | Type | Width [min] | Area [25 µV*s] | Height [25 µV] | Area %   |
|--------|---------------|------|-------------|----------------|----------------|----------|
| 1      | 2.210         | MM   | 0.0972      | 2897.20874     | 496.63031      | 42.51702 |
| 2      | 11.702        | MM   | 0.0656      | 3917.02417     | 995.61847      | 57.48298 |

Totals : 6814.23291 1492.24878

GC analysis for the products obtained by hydrogenation of toluene

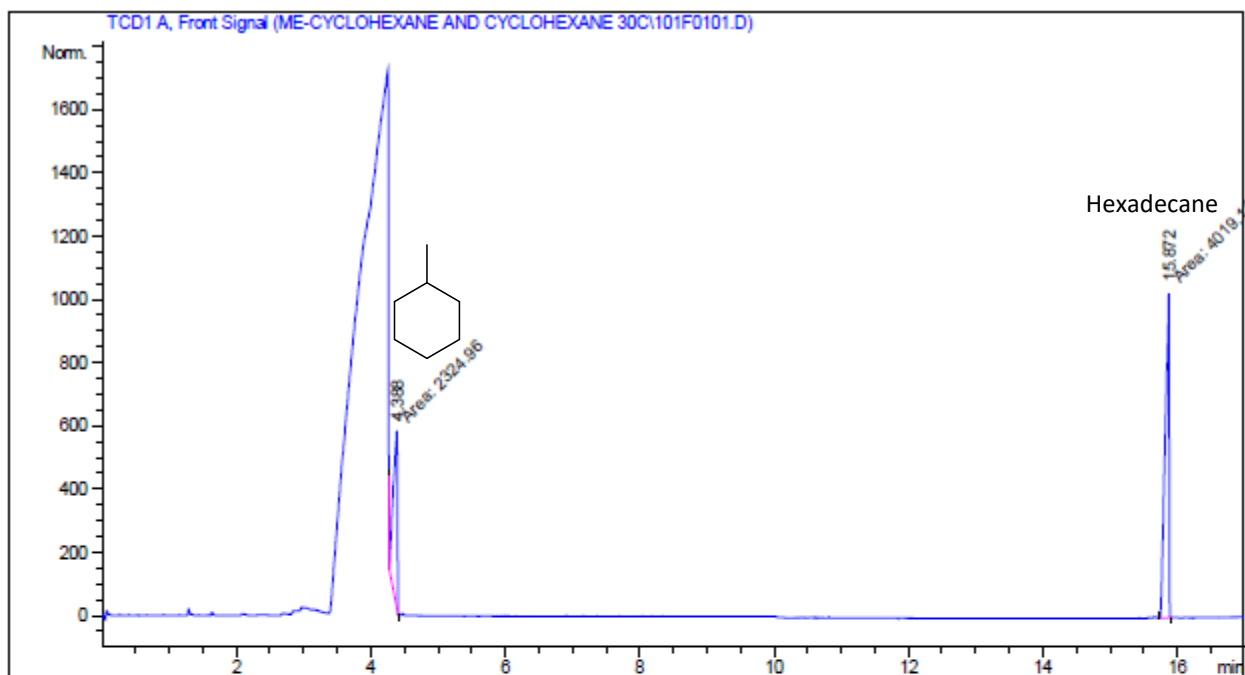

=====  
Area Percent Report  
=====

Sorted By : Signal  
Multiplier: : 1.0000  
Dilution: : 1.0000  
Use Multiplier & Dilution Factor with ISTDs

Signal 1: TCD1 A, Front Signal

| Peak # | RetTime [min] | Type | Width [min] | Area [25 µV*s] | Height [25 µV] | Area %   |
|--------|---------------|------|-------------|----------------|----------------|----------|
| 1      | 4.388         | MM   | 0.0673      | 2324.95557     | 575.88855      | 36.64765 |
| 2      | 15.872        | MM   | 0.0638      | 4019.12329     | 1049.16675     | 63.35235 |

Totals : 6344.07886 1625.05530

GC analysis for the products obtained by hydrogenation of ethylbenzene

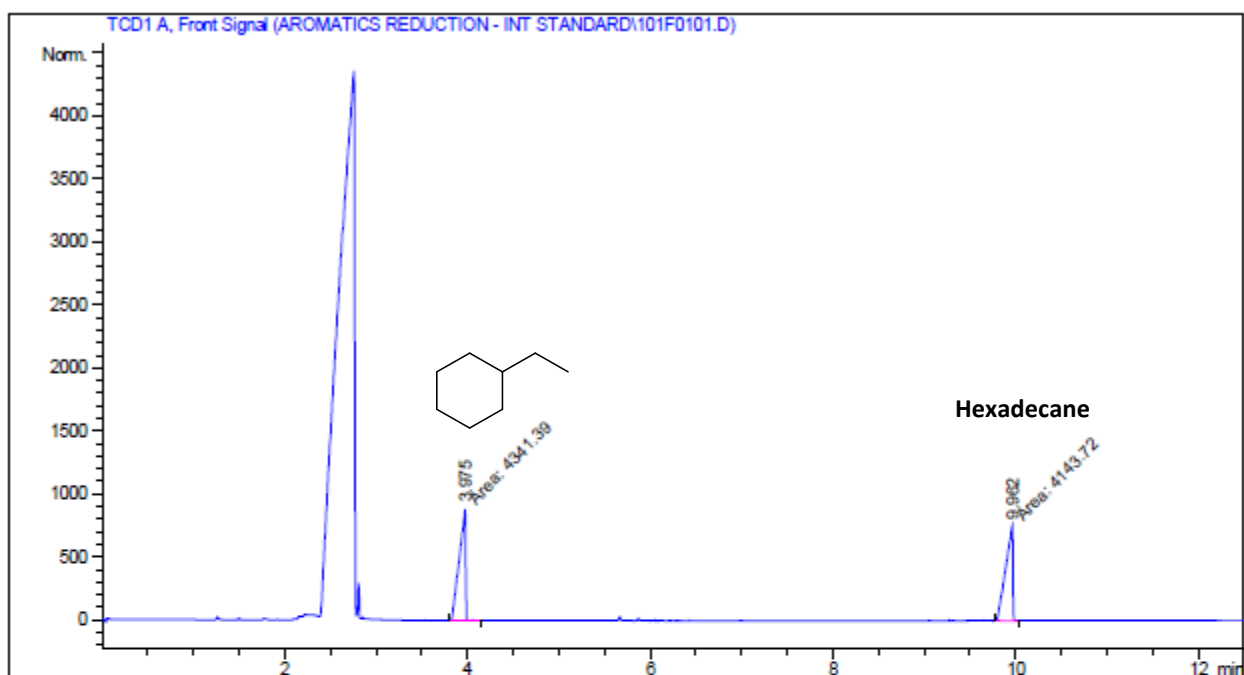

=====  
Area Percent Report  
=====

Sorted By : Signal  
Multiplier: : 1.0000  
Dilution: : 1.0000  
Use Multiplier & Dilution Factor with ISTDs

Signal 1: TCD1 A, Front Signal

| Peak # | RetTime [min] | Type | Width [min] | Area [25 µV*s] | Height [25 µV] | Area %   |
|--------|---------------|------|-------------|----------------|----------------|----------|
| 1      | 3.975         | MM   | 0.0801      | 4341.39307     | 903.26495      | 51.16482 |
| 2      | 9.962         | MM   | 0.0900      | 4143.72021     | 767.62976      | 48.83518 |

Totals : 8485.11328 1670.89471

# GC analysis for the products obtained by hydrogenation of propylbenzene

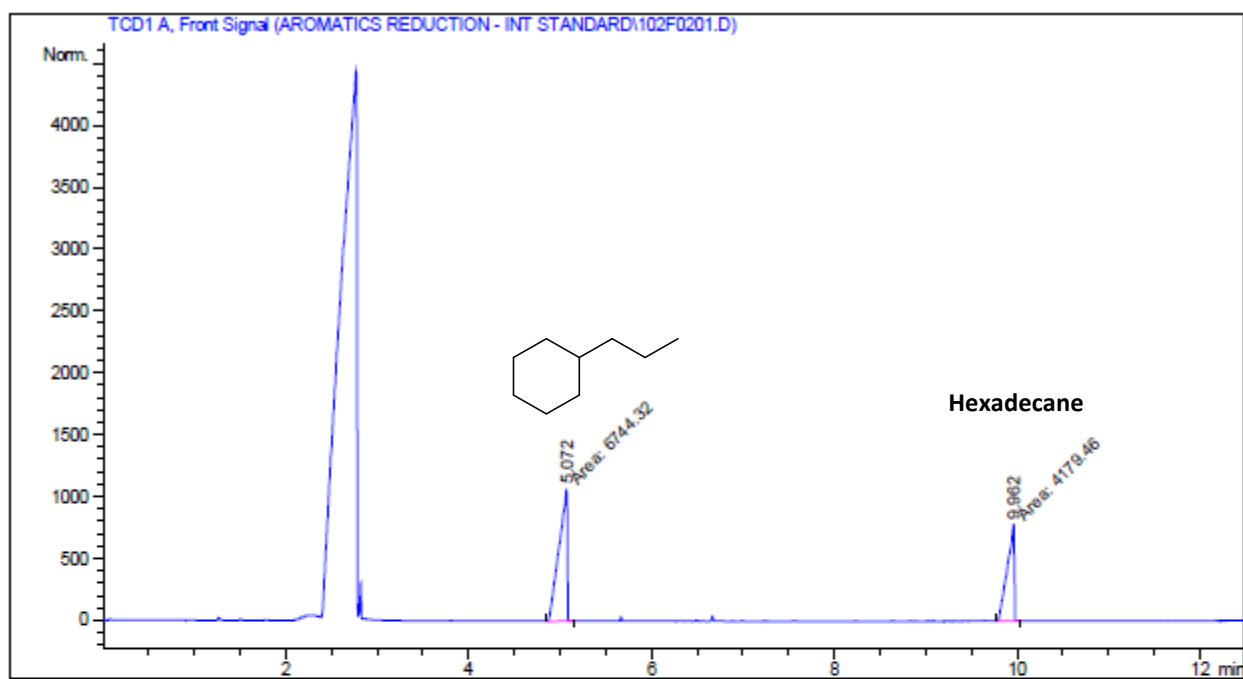

## Area Percent Report

Sorted By : Signal  
Multiplier: : 1.0000  
Dilution: : 1.0000  
Use Multiplier & Dilution Factor with ISTDs

Signal 1: TCD1 A, Front Signal

| Peak # | RetTime [min] | Type | Width [min] | Area [25 µV*s] | Height [25 µV] | Area %   |
|--------|---------------|------|-------------|----------------|----------------|----------|
| 1      | 5.072         | MM   | 0.1042      | 6744.32324     | 1078.44275     | 61.73979 |
| 2      | 9.962         | MM   | 0.0882      | 4179.46436     | 789.55872      | 38.26021 |

Totals : 1.09238e4 1868.00146

# GC analysis for the products obtained by hydrogenation of *m*-xylene

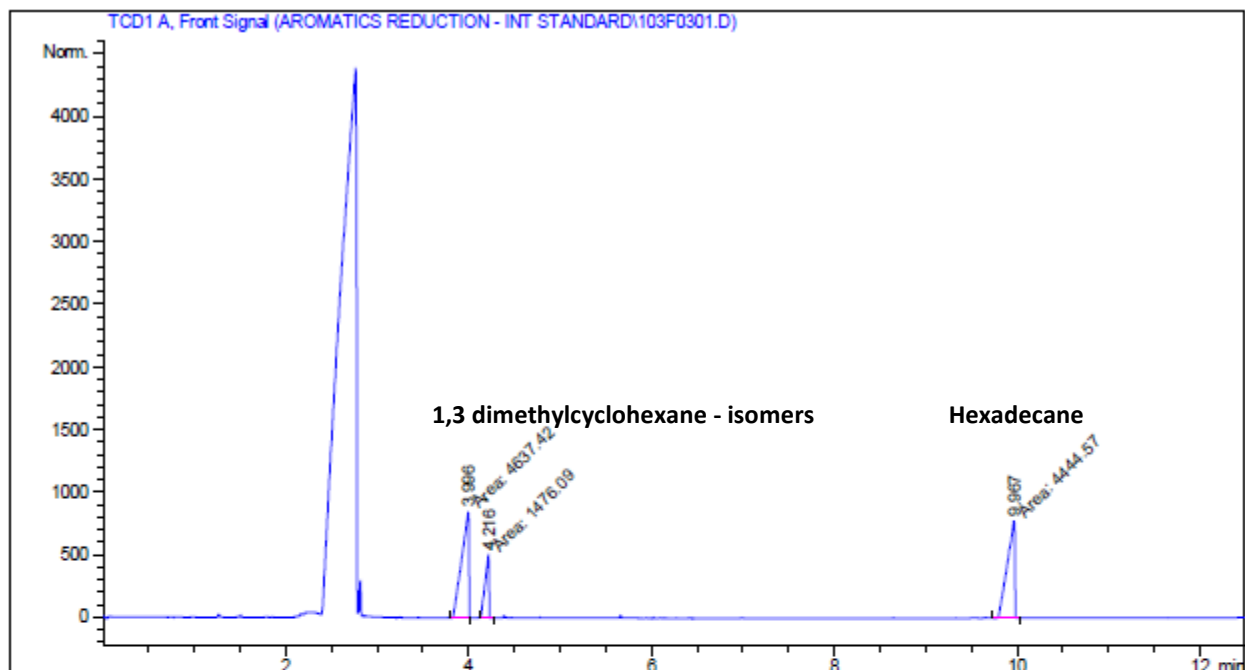

## Area Percent Report

Sorted By : Signal  
Multiplier: : 1.0000  
Dilution: : 1.0000  
Use Multiplier & Dilution Factor with ISTDs

Signal 1: TCD1 A, Front Signal

| Peak # | RetTime [min] | Type | Width [min] | Area [25 µV*s] | Height [25 µV] | Area %   |
|--------|---------------|------|-------------|----------------|----------------|----------|
| 1      | 3.996         | MM   | 0.0912      | 4637.41895     | 847.20819      | 43.92292 |
| 2      | 4.216         | MM   | 0.0494      | 1476.09338     | 497.98663      | 13.98069 |
| 3      | 9.967         | MM   | 0.0956      | 4444.57227     | 775.12061      | 42.09639 |

Totals : 1.05581e4 2120.31543

GC analysis for the products obtained by hydrogenation of mesitylene

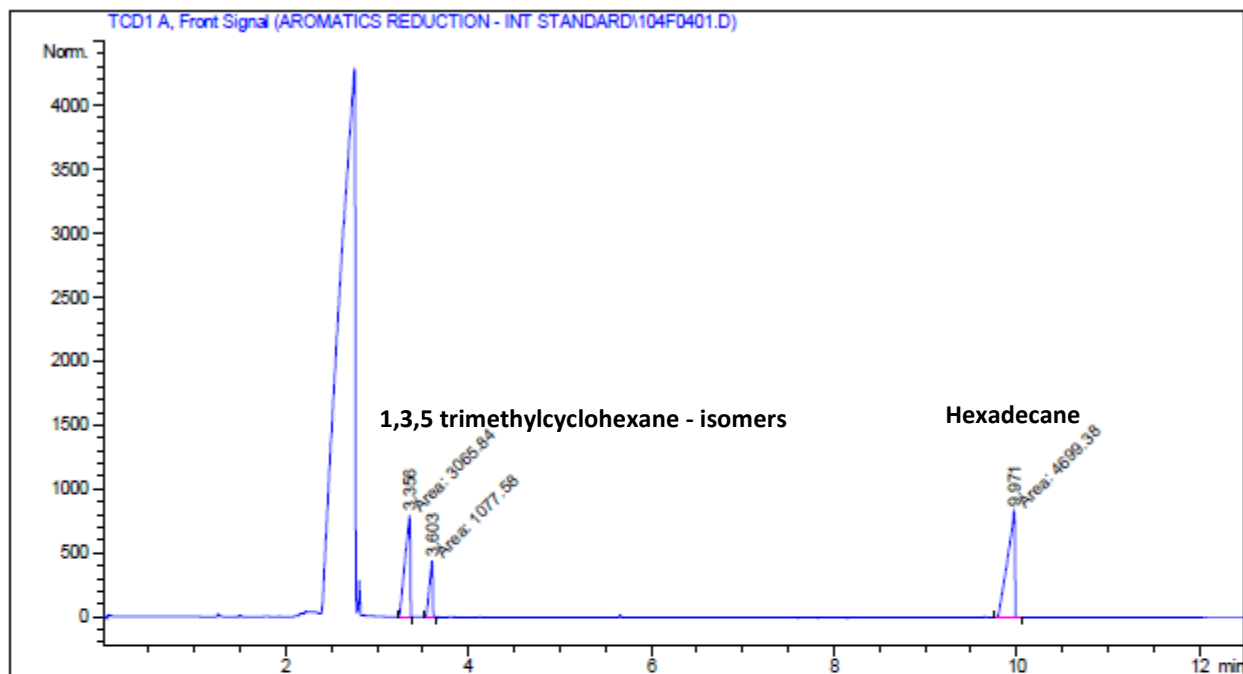

=====  
Area Percent Report  
=====

Sorted By : Signal  
Multiplier: : 1.0000  
Dilution: : 1.0000  
Use Multiplier & Dilution Factor with ISTDs

Signal 1: TCD1 A, Front Signal

| Peak # | RetTime [min] | Type | Width [min] | Area [25 µV*s] | Height [25 µV] | Area %   |
|--------|---------------|------|-------------|----------------|----------------|----------|
| 1      | 3.356         | MM   | 0.0638      | 3065.84180     | 800.90167      | 34.67047 |
| 2      | 3.603         | MM   | 0.0405      | 1077.57886     | 442.99286      | 12.18594 |
| 3      | 9.971         | MM   | 0.0941      | 4699.38428     | 832.36743      | 53.14359 |

Totals : 8842.80493 2076.26196



# GC analysis for the products obtained by hydrogenation of ethyl benzoate

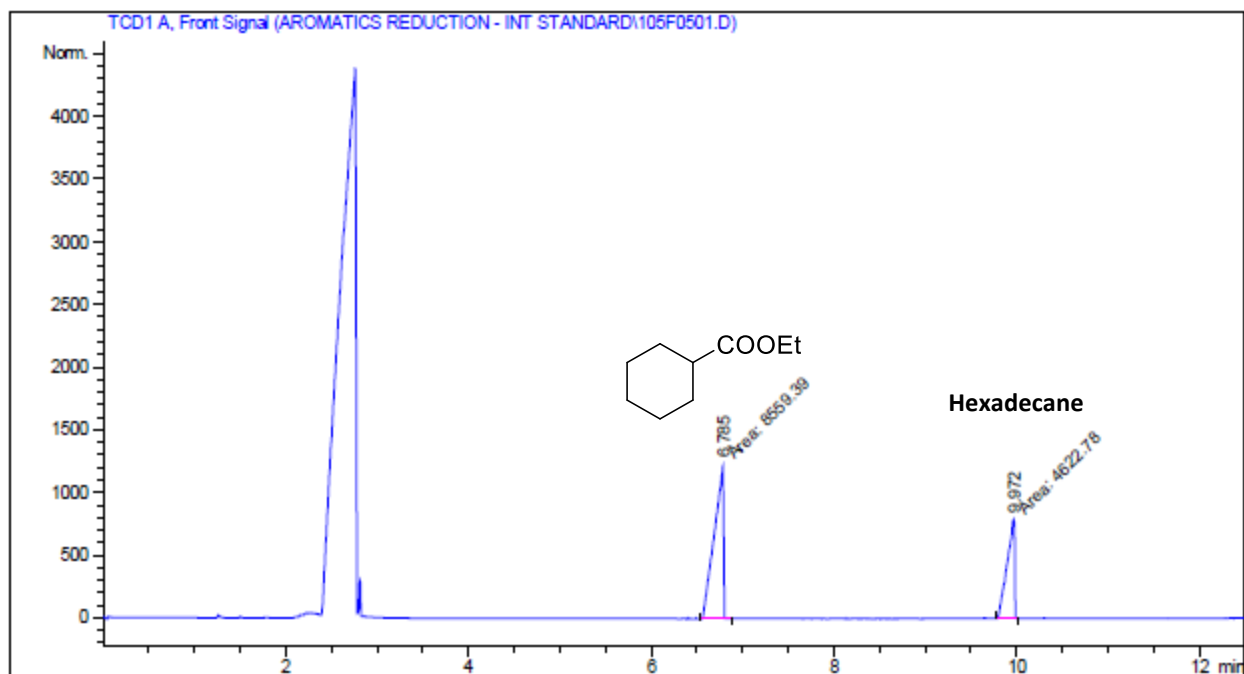

## Area Percent Report

Sorted By : Signal  
Multiplier: : 1.0000  
Dilution: : 1.0000  
Use Multiplier & Dilution Factor with ISTDs

Signal 1: TCD1 A, Front Signal

| Peak # | RetTime [min] | Type | Width [min] | Area [25 µV*s] | Height [25 µV] | Area %   |
|--------|---------------|------|-------------|----------------|----------------|----------|
| 1      | 6.785         | MM   | 0.1144      | 8559.38770     | 1247.05359     | 64.93154 |
| 2      | 9.972         | MM   | 0.0952      | 4622.78467     | 809.40308      | 35.06846 |

Totals : 1.31822e4 2056.45667

# GC analysis for the products obtained by hydrogenation of nitrobenzene

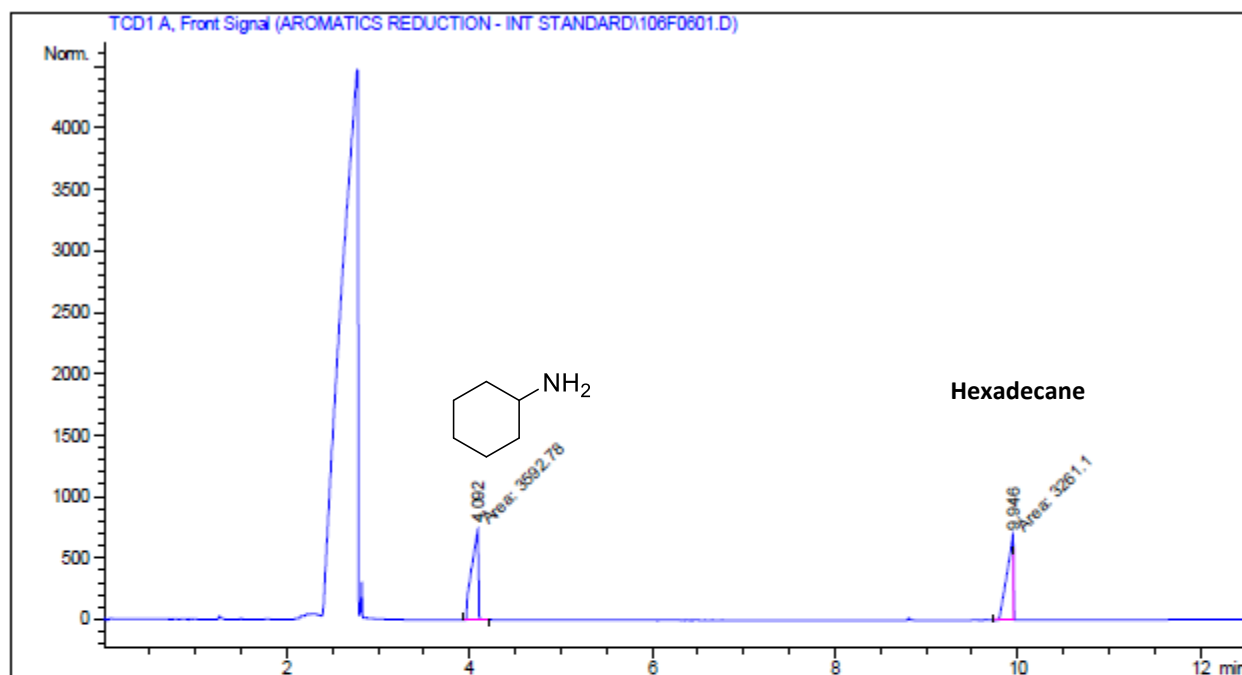

## Area Percent Report

Sorted By : Signal  
Multiplier: : 1.0000  
Dilution: : 1.0000  
Use Multiplier & Dilution Factor with ISTDs

Signal 1: TCD1 A, Front Signal

| Peak # | RetTime [min] | Type | Width [min] | Area [25 µV*s] | Height [25 µV] | Area %   |
|--------|---------------|------|-------------|----------------|----------------|----------|
| 1      | 4.092         | MM   | 0.0805      | 3592.77637     | 744.04248      | 52.41964 |
| 2      | 9.946         | MM   | 0.0781      | 3261.09814     | 695.64331      | 47.58036 |

Totals : 6853.87451 1439.68579

<sup>1</sup>H NMR spectrum of the products obtained by hydrogenation of benzene

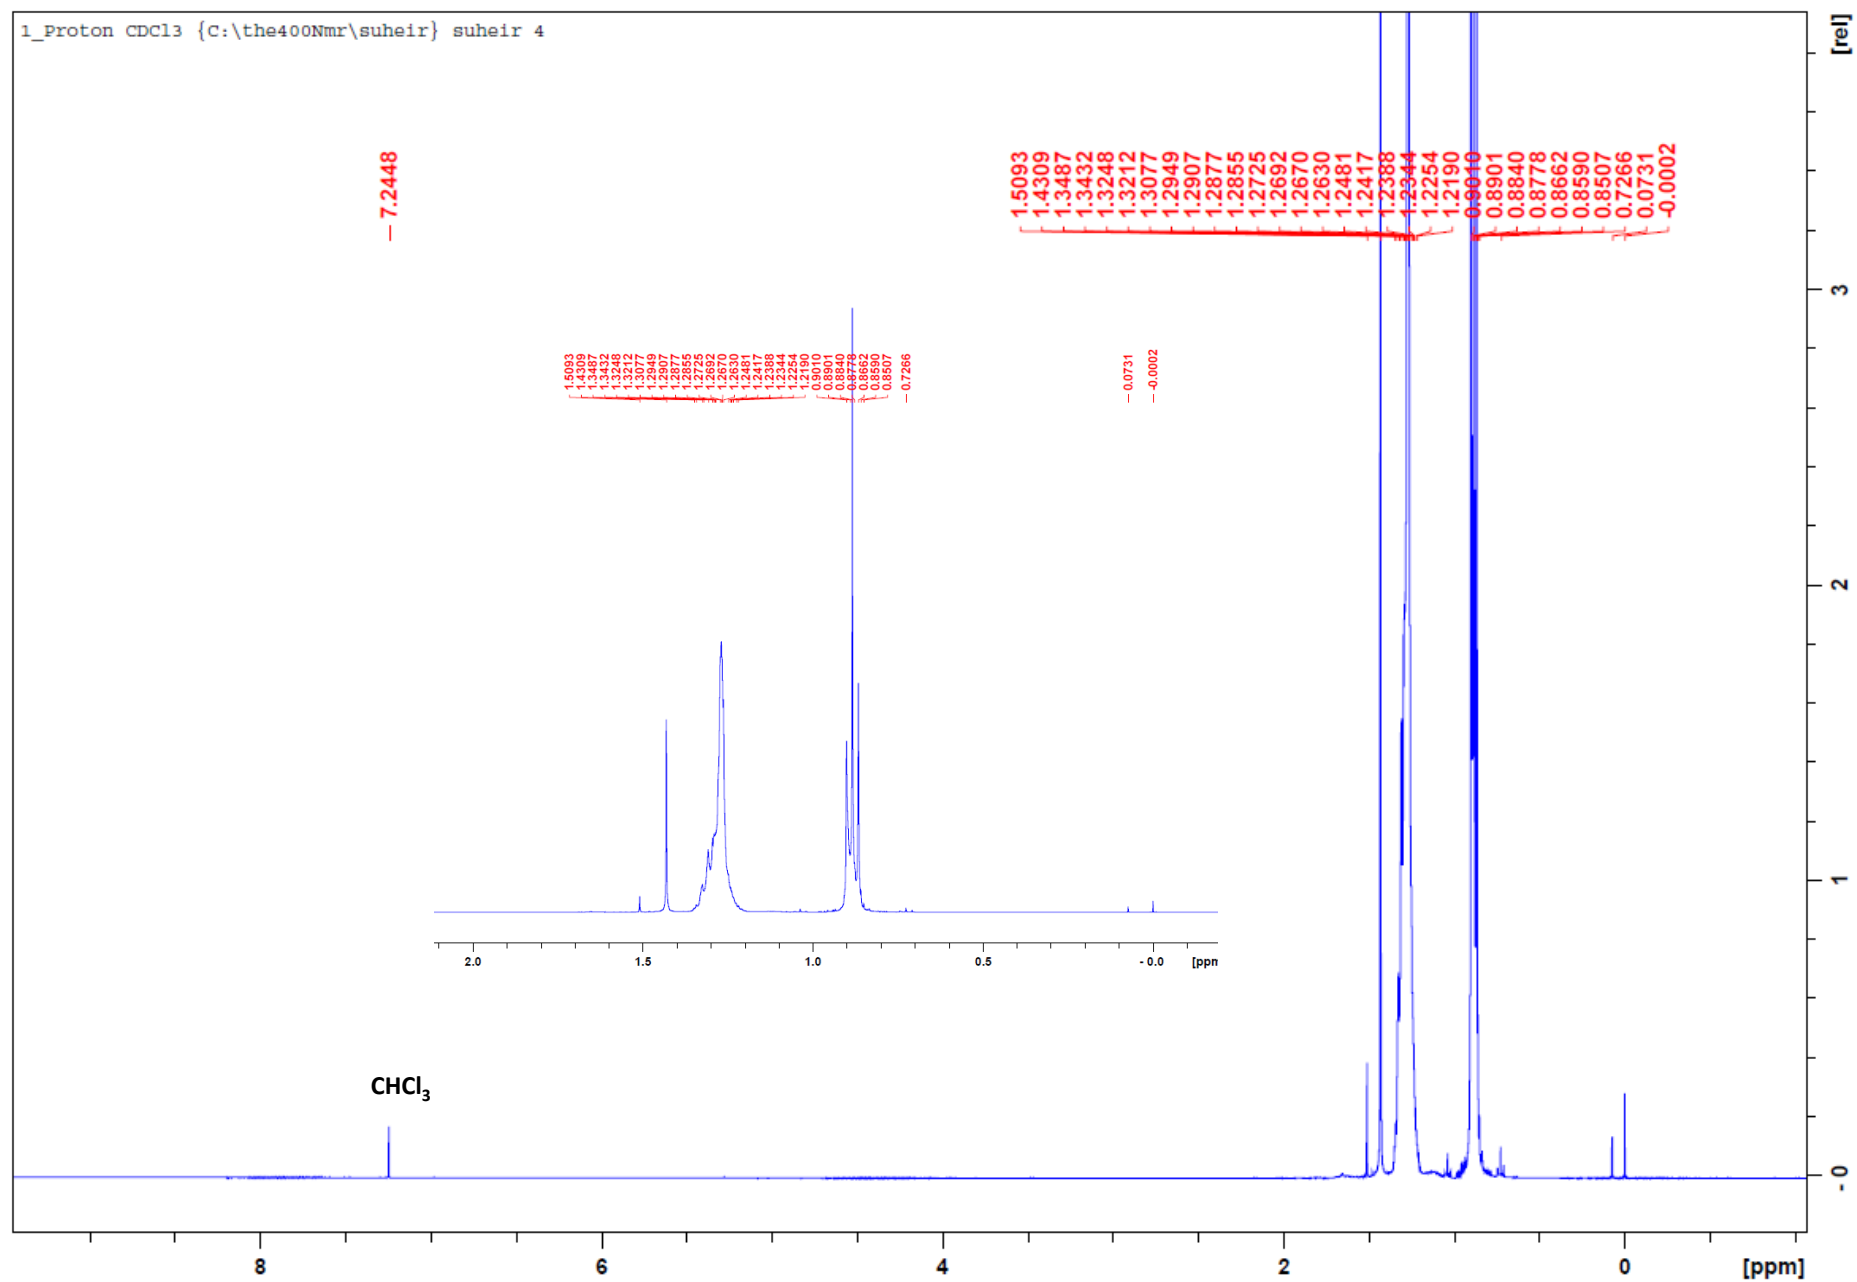

<sup>1</sup>H NMR spectrum of the products obtained by hydrogenation of toluene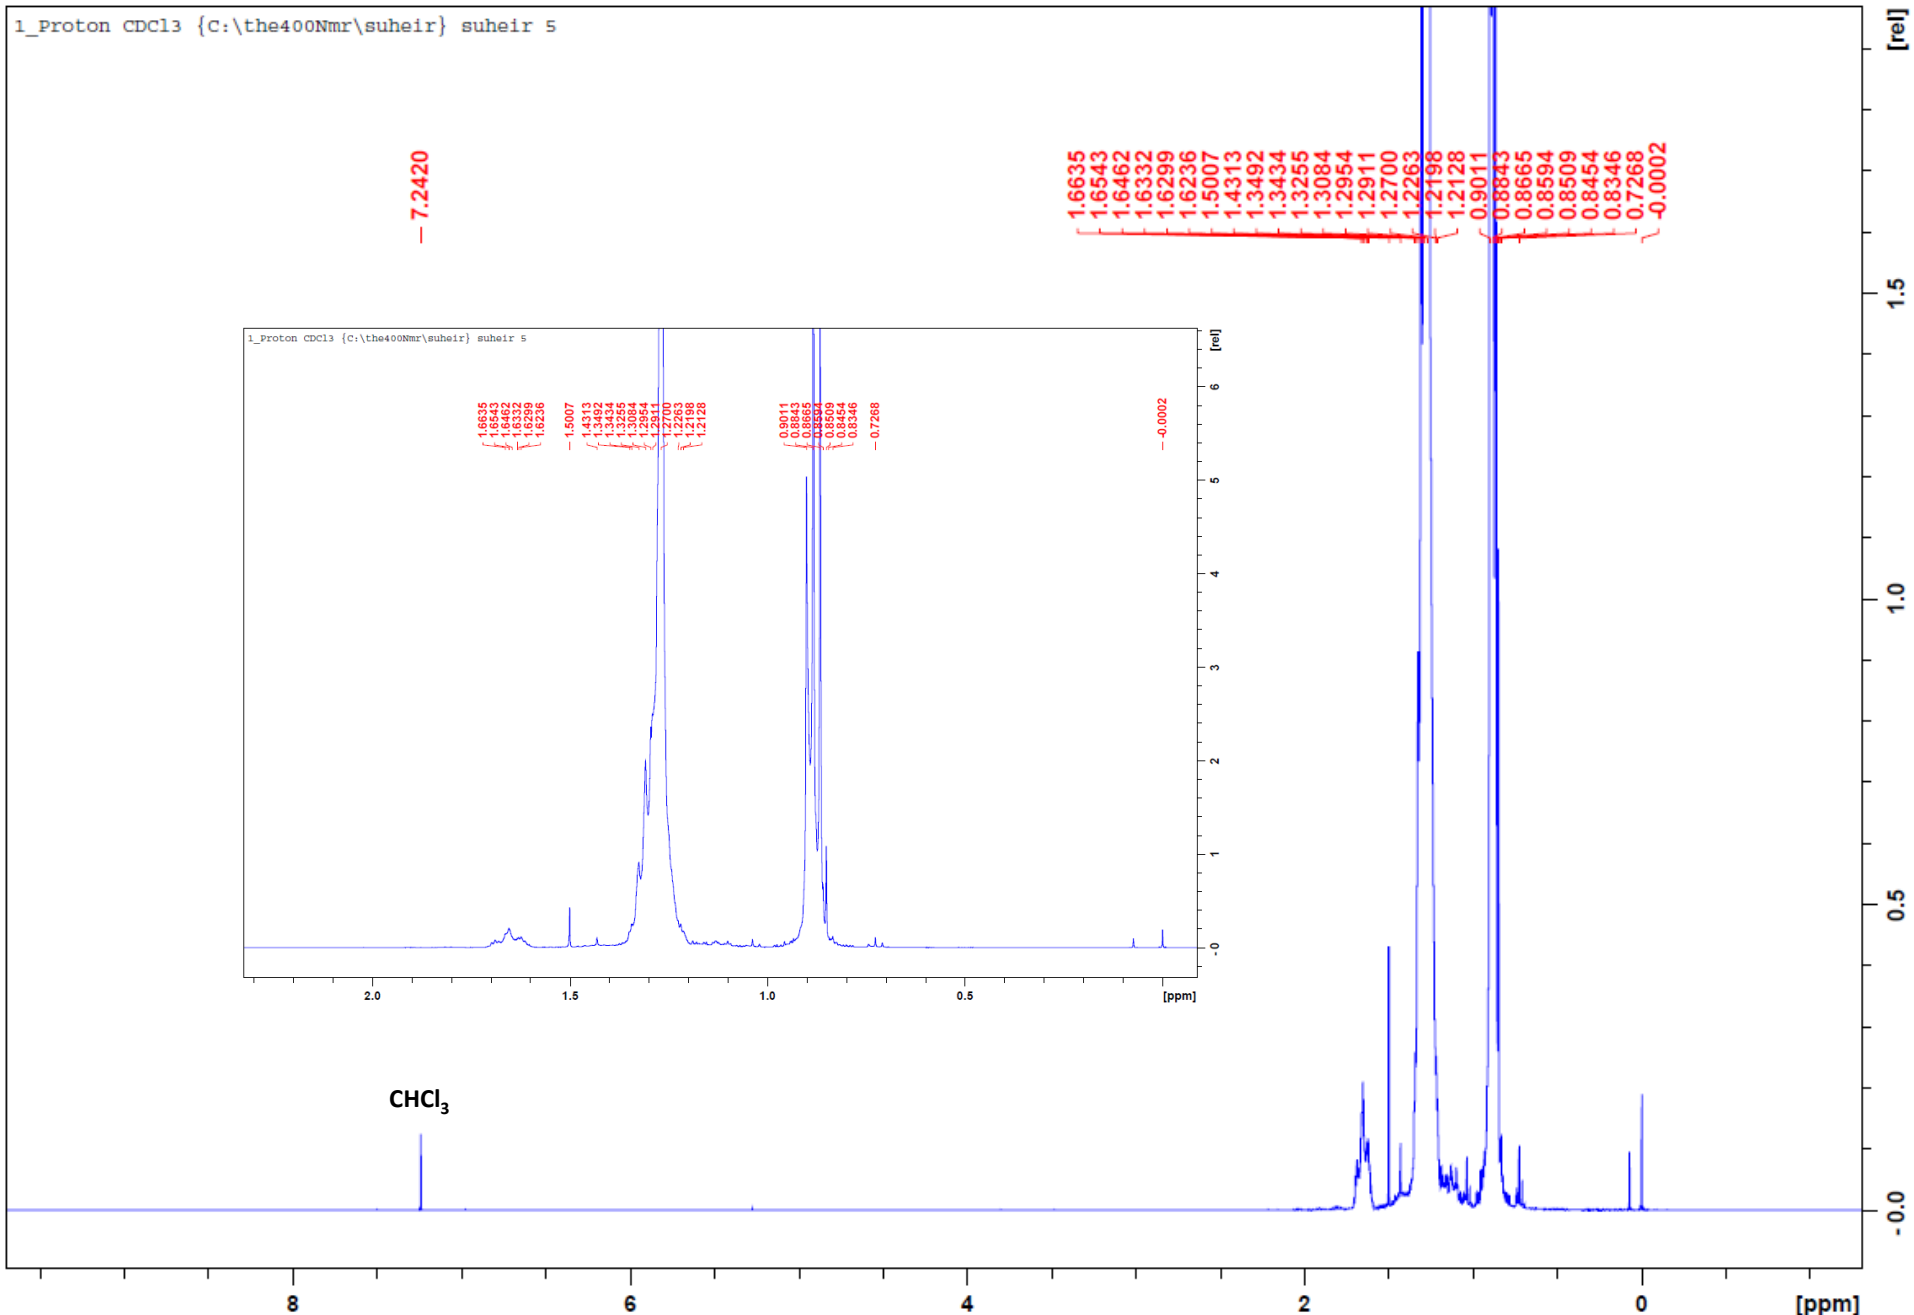

<sup>1</sup>HNMR spectrum of the products obtained by hydrogenation of ethylbenzene

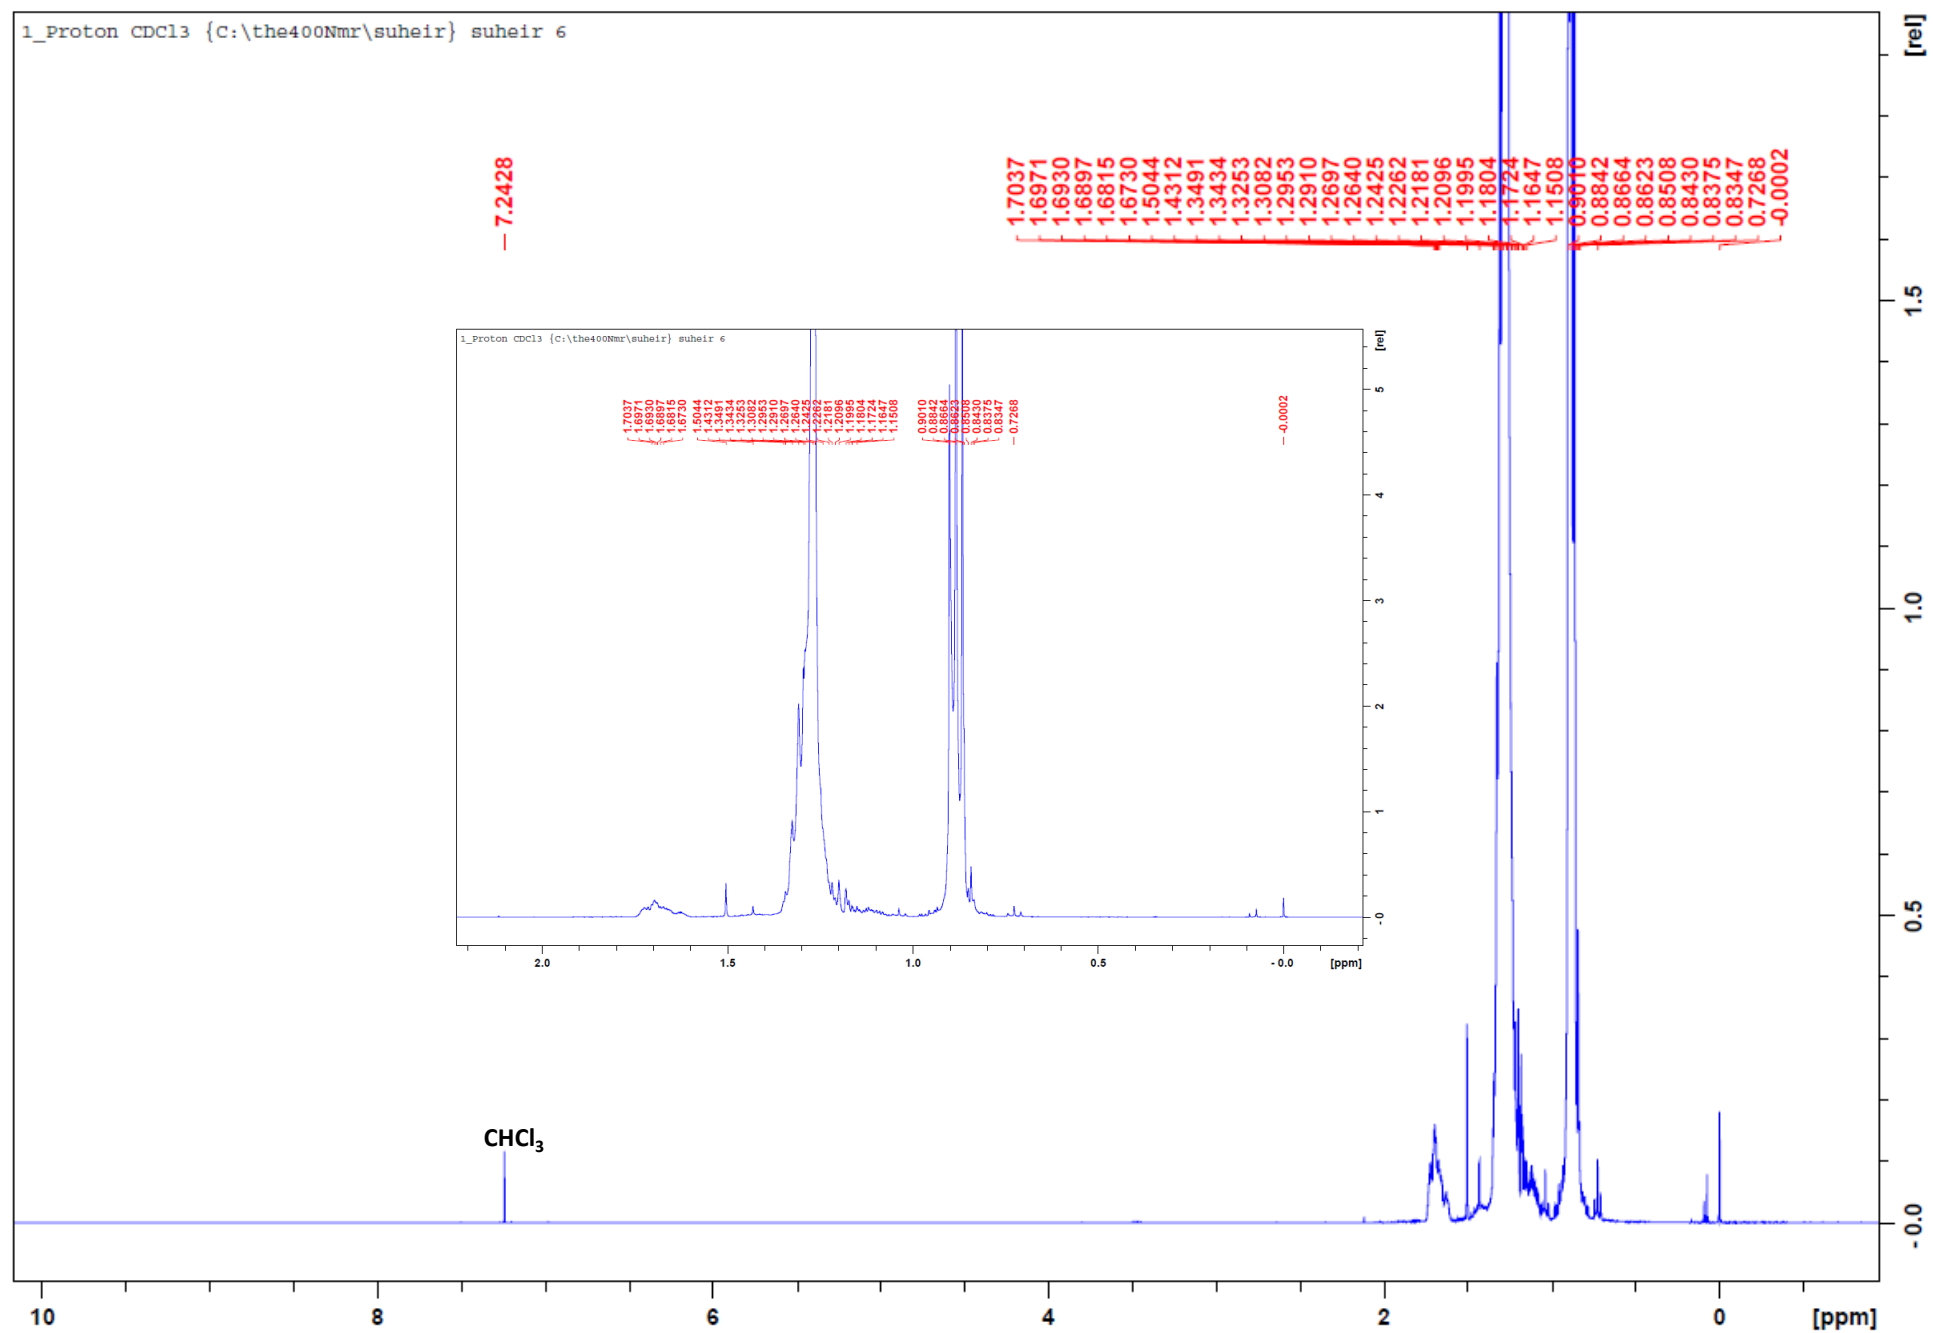



<sup>1</sup>HNMR spectrum of the products obtained by hydrogenation of *m*-xylene

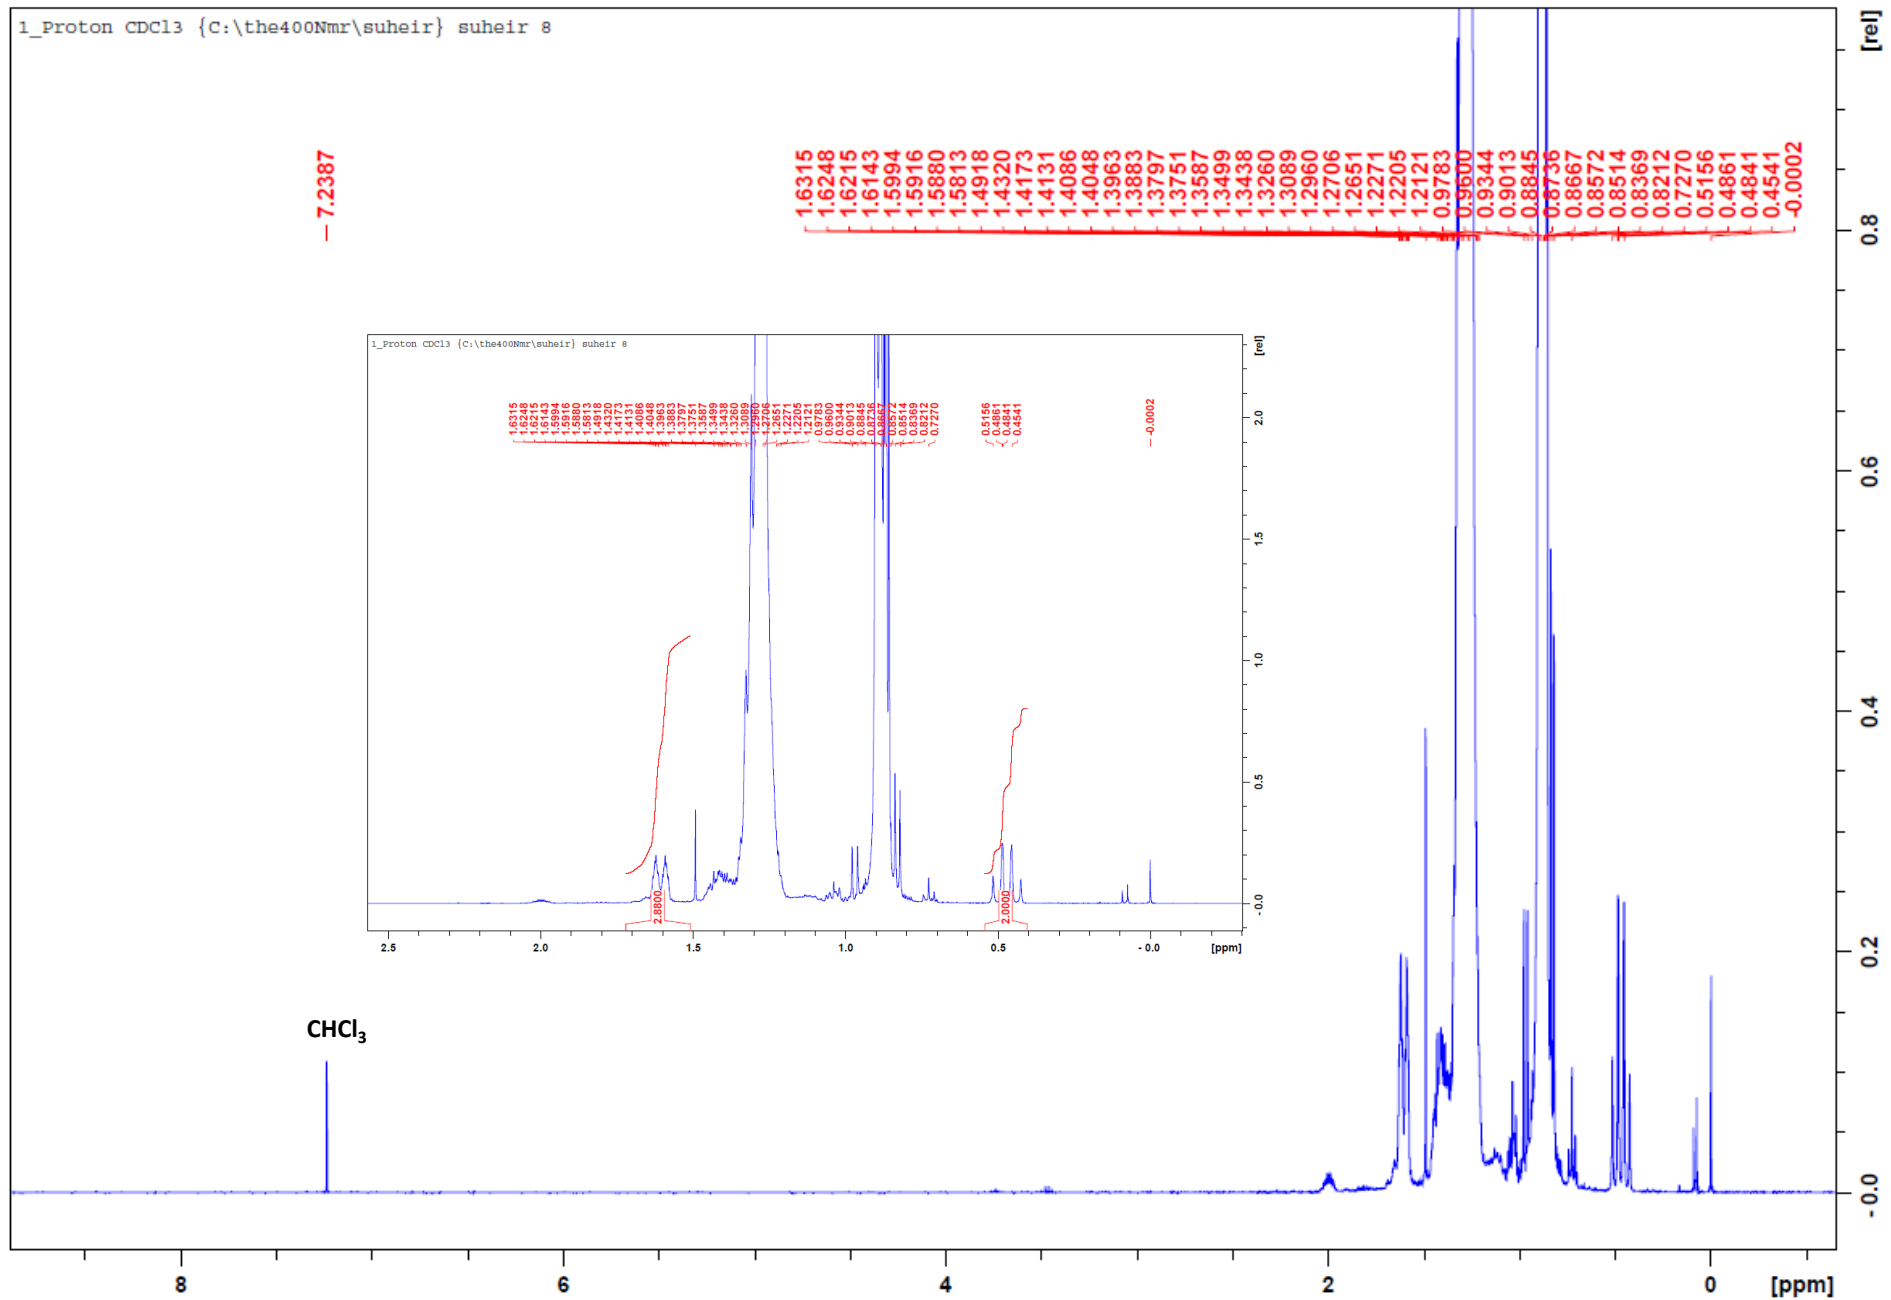

<sup>1</sup>HNMR spectrum of the products obtained by hydrogenation of mesitylene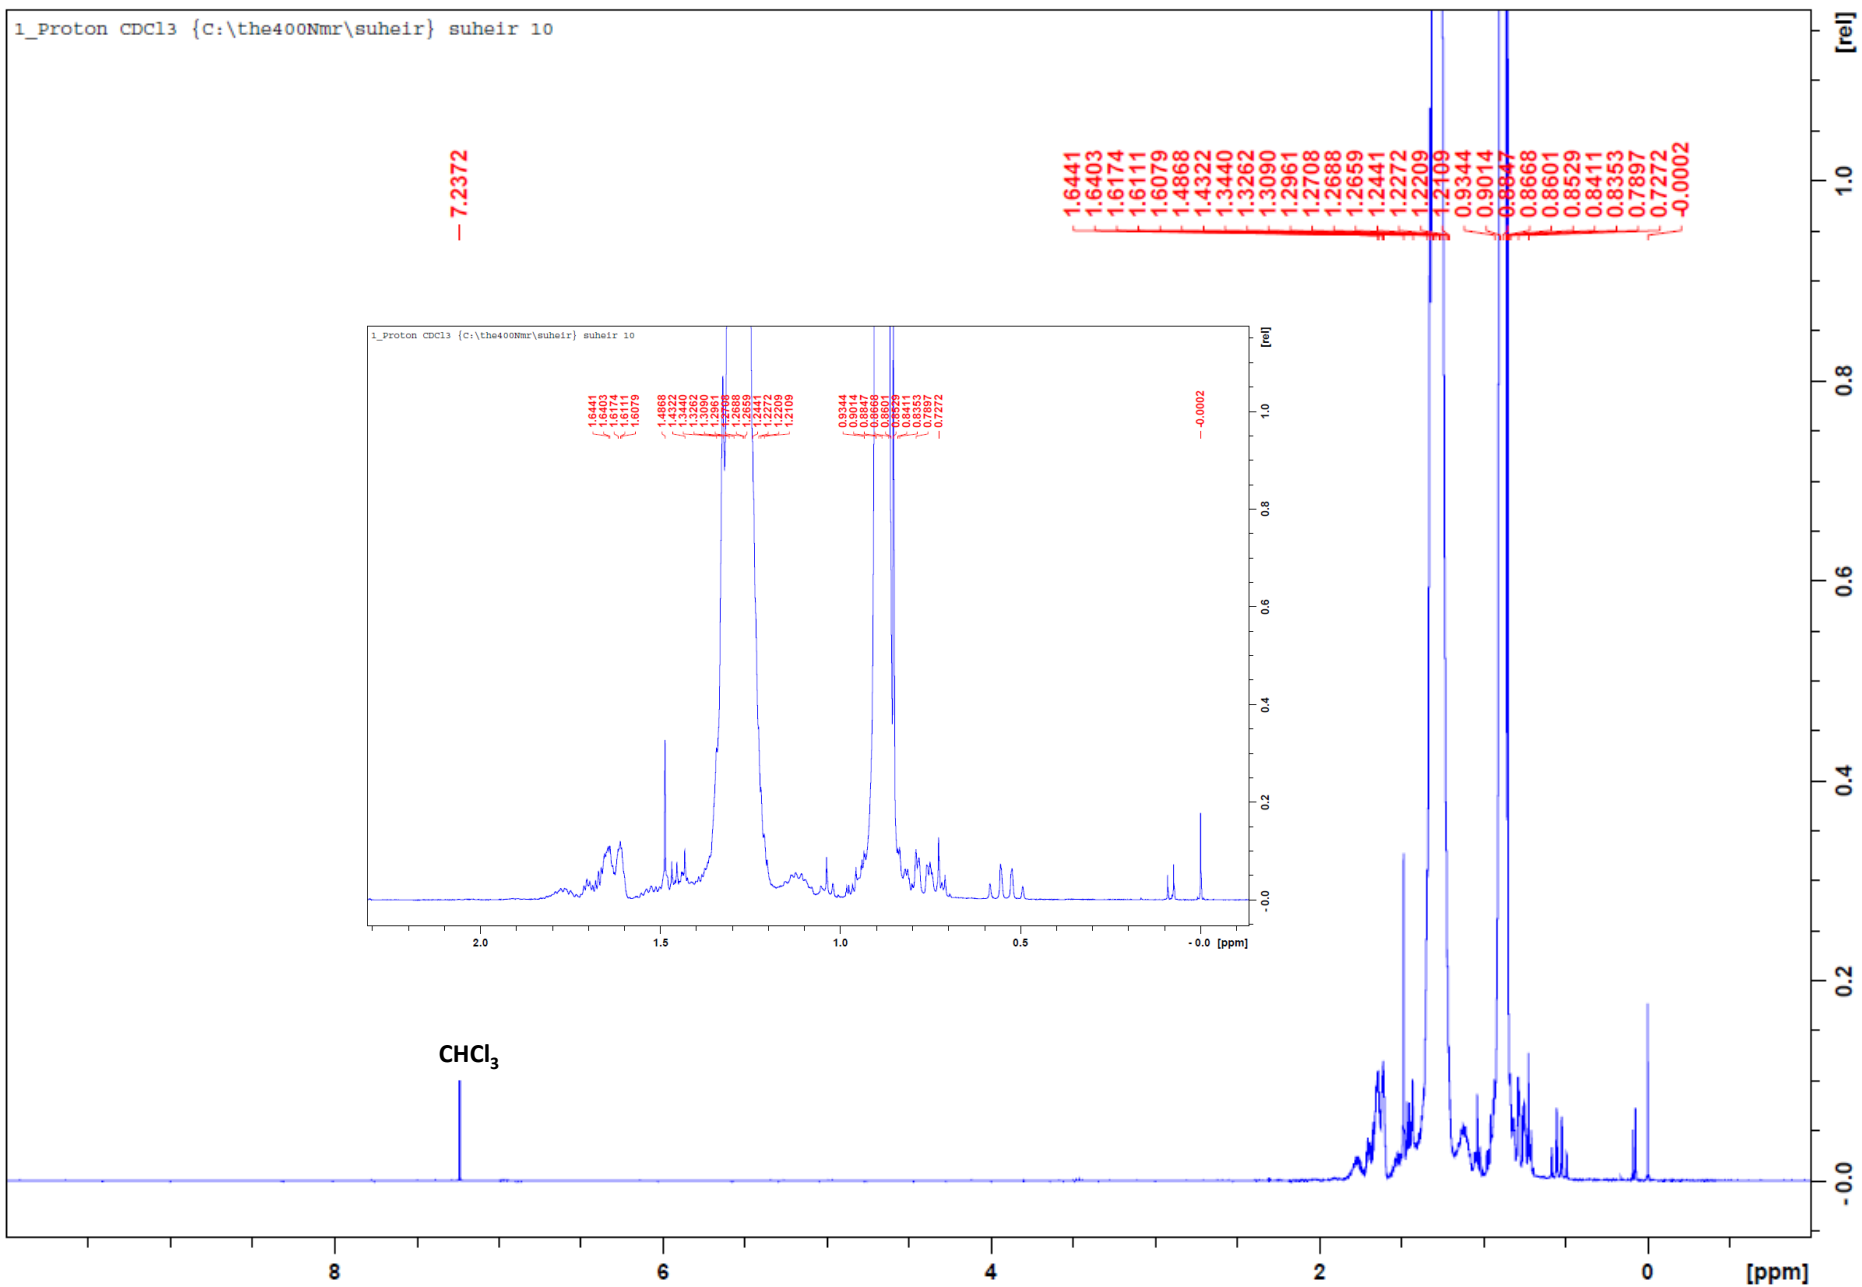



<sup>1</sup>HNMR spectrum of the products obtained by hydrogenation of ethyl benzoate

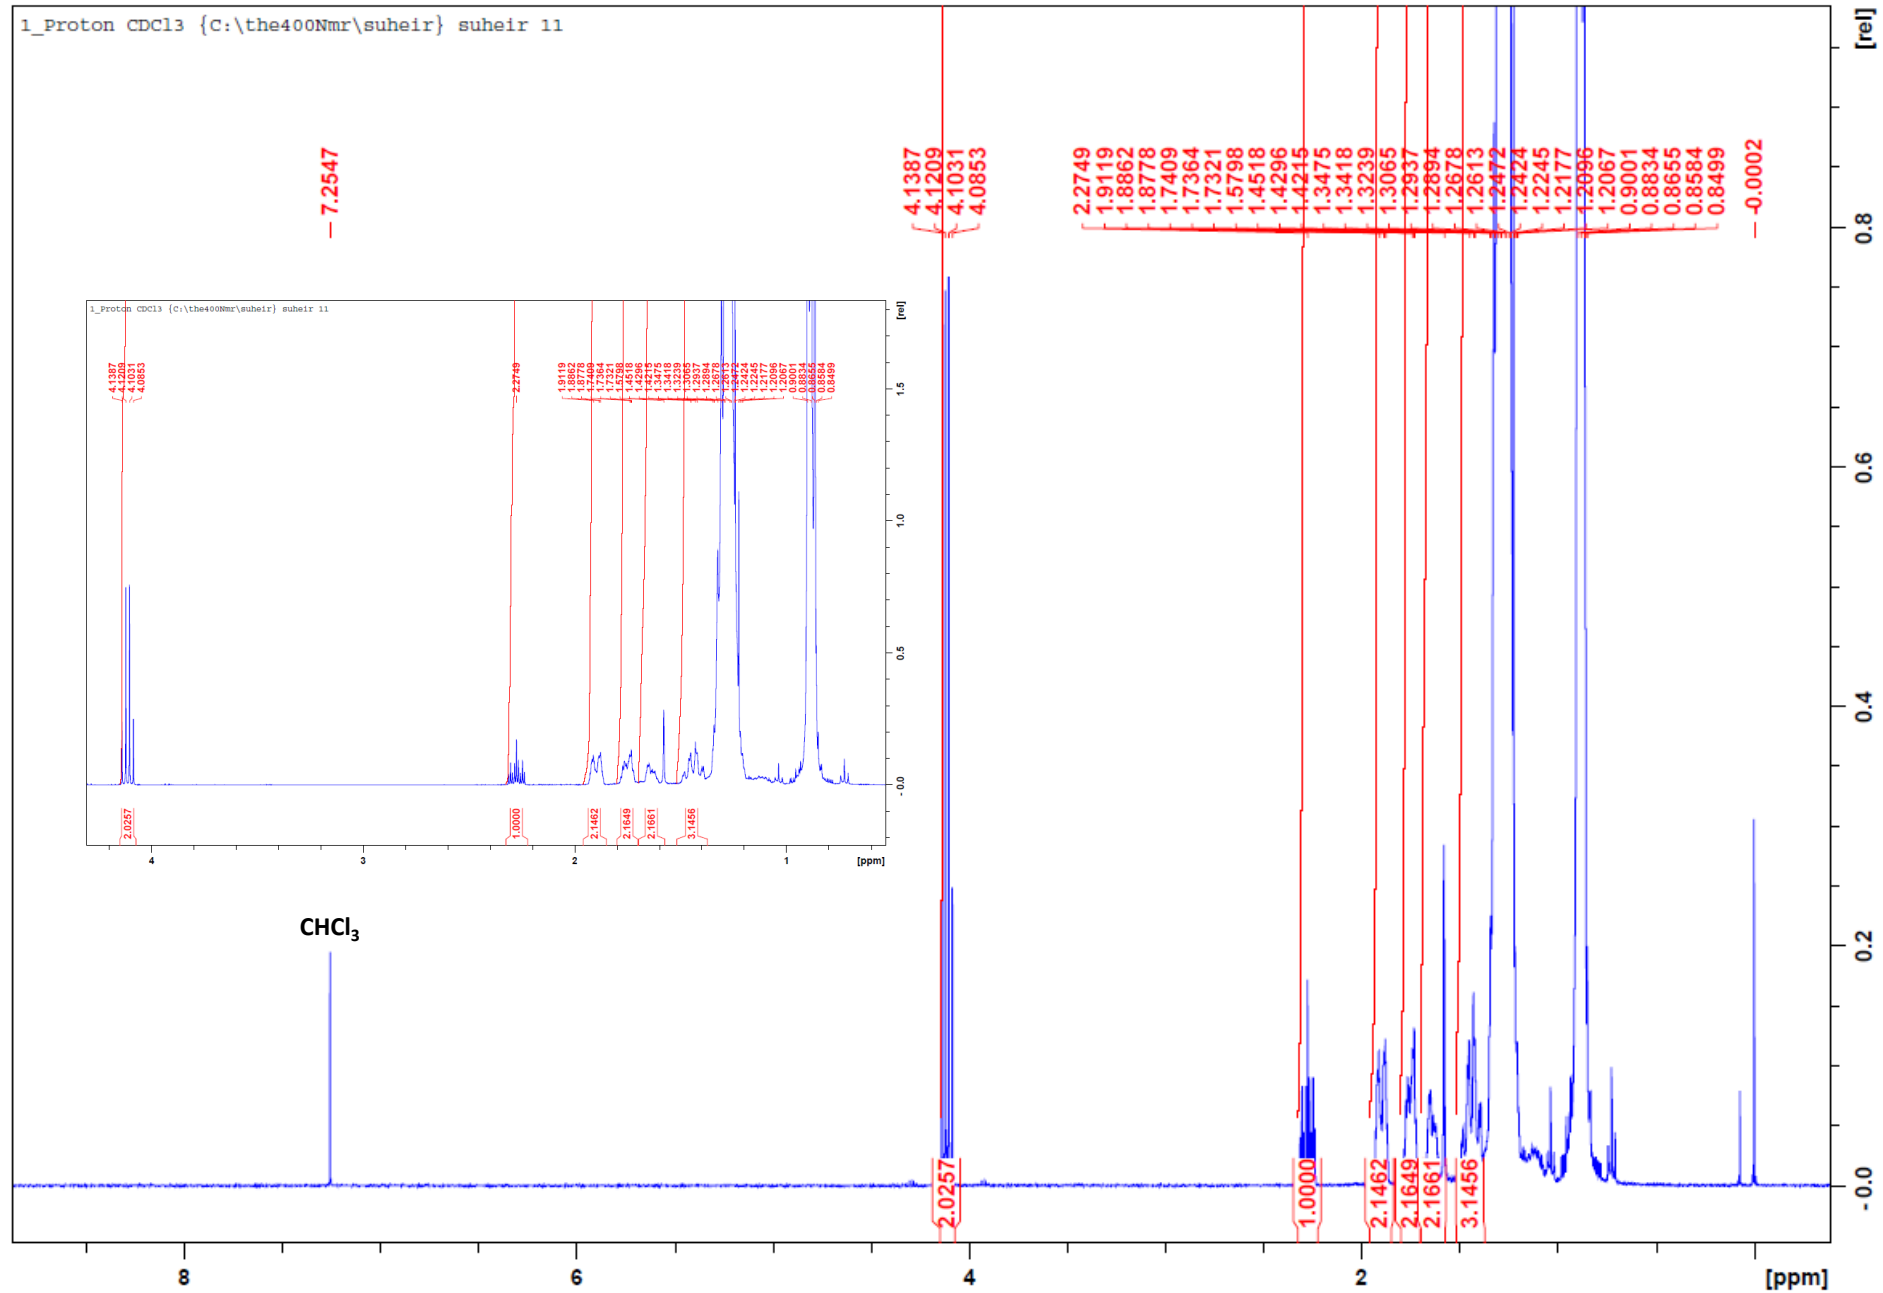

<sup>1</sup>HNMR spectrum of the products obtained by hydrogenation of nitrobenzene

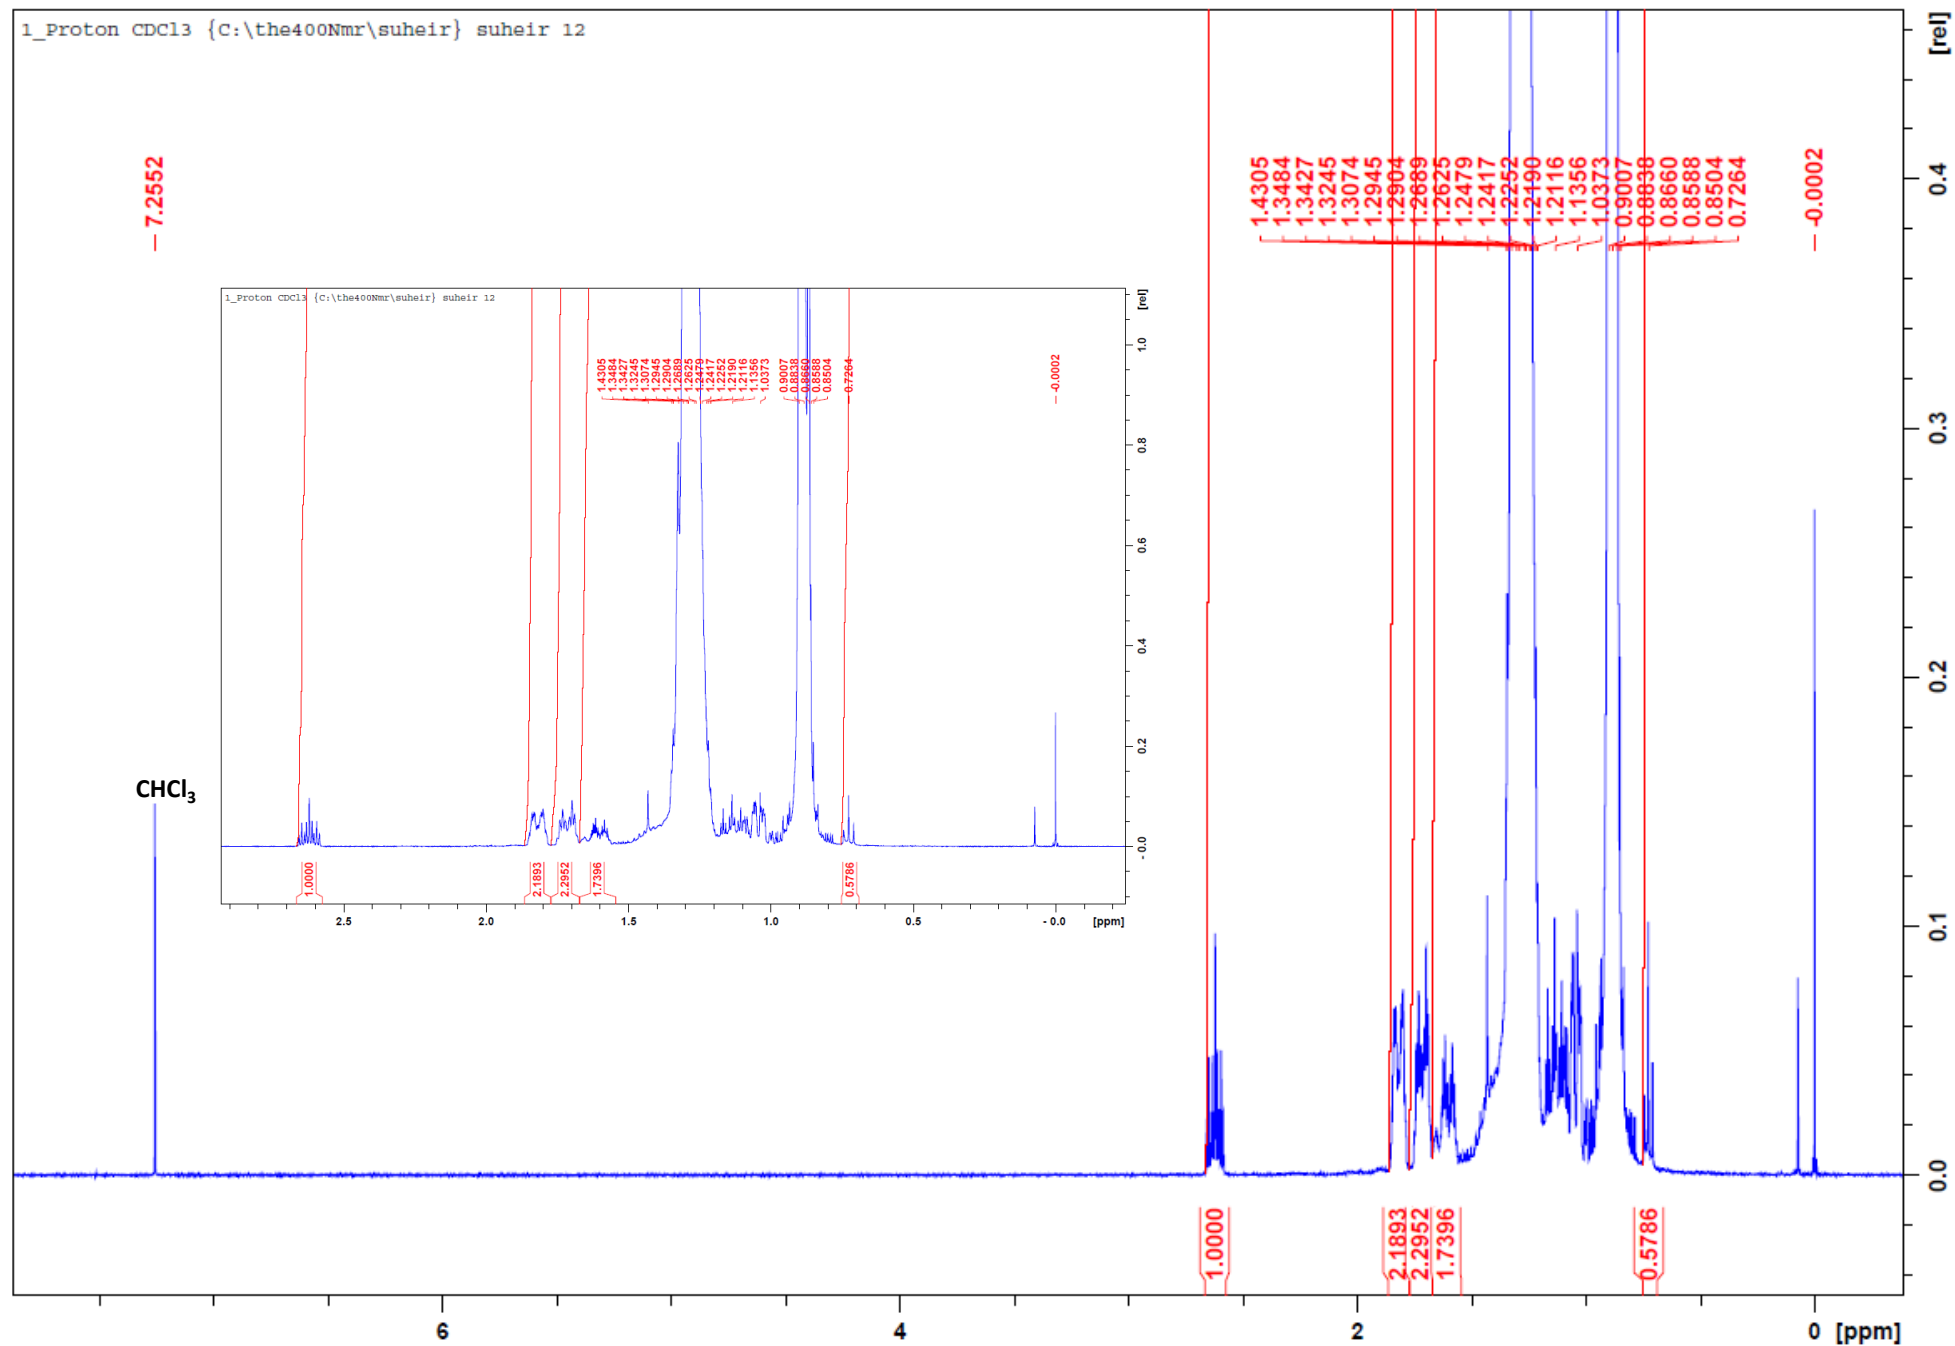

Supplement: s1 [file s1]
